# Supplementary material for: CRISPR/Cas9 editing of three CRUCIFERIN C homoeologues alters the seed protein profile in Camelina sativa
Source: PubMed Central journal article supplement (PMC6611024; doi:10.1186/s12870-019-1873-0), 2019-07-04
Supplement: 12870_2019_1873_MOESM2_ESM.pdf [file 12870_2019_1873_MOESM2_ESM.pdf]

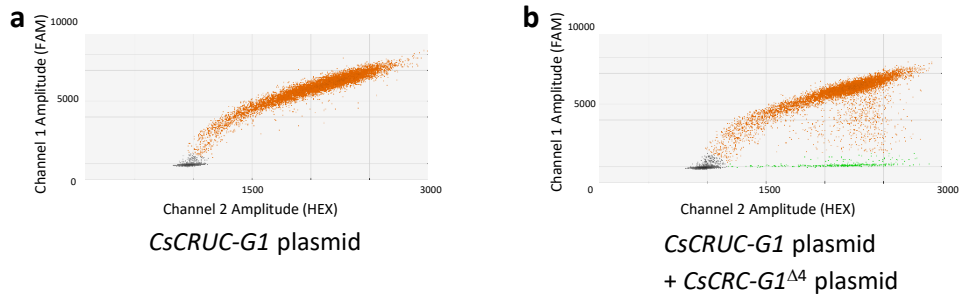

**Figure S2. Validation of ddPCR drop-off assay to detect mutations mediated by gRNA512.**

**a** *CsCRUC-G1* plasmid generates amplicons in which both drop-off (FAM) probe and reference probe (HEX) bind, resulting in only double-positive droplets. **b** A mixture *CsCRUC-G1* plasmid and *CsCRUC-G1*<sup>Δ4</sup> plasmid generate wild-type amplicons in which both drop-off (FAM) probe and reference probe (HEX) bind, resulting in double-positive droplets, and  $\Delta 4$  mutation-containing amplicons in which only the reference probe (HEX) binds, resulting in single-positive droplets.
