# Supplementary material for: CRISPR/Cas9 editing of three CRUCIFERIN C homoeologues alters the seed protein profile in Camelina sativa
Source: PubMed Central journal article supplement (PMC6611024; doi:10.1186/s12870-019-1873-0), 2019-07-04
Supplement: 12870_2019_1873_MOESM3_ESM.pdf [file 12870_2019_1873_MOESM3_ESM.pdf]

**Figure S3. CRISPR-derived mutations identified in *CsCRUC*.** **a-k** Alignment of *CsCRUC* sequences PCR amplified and cloned from plants listed in Table 1. Sequences are from independent colony clones of the *CsCRUC* amplicon generated using plant genomic DNA as template. Cas9 cut site is indicated by an arrow. Homoeologues are indicated and assigned based on SNPs. Grouped sequences designated G1, G2 and G3 correspond to the *CsCRUC* genes from the three sub-genomes (*CsCRUC-G1*, *CsCRUC-G2*, and *CsCRUC-G3*). \* indicates sequence with mutation at the Cas9 cut site, and likely represents a heritable mutation. † indicates a unique mutated sequence.
