# Supplementary material for: CRISPR/Cas9 editing of three CRUCIFERIN C homoeologues alters the seed protein profile in Camelina sativa
Source: PubMed Central journal article supplement (PMC6611024; doi:10.1186/s12870-019-1873-0), 2019-07-04
Supplement: 12870_2019_1873_MOESM6_ESM.pdf [file 12870_2019_1873_MOESM6_ESM.pdf]

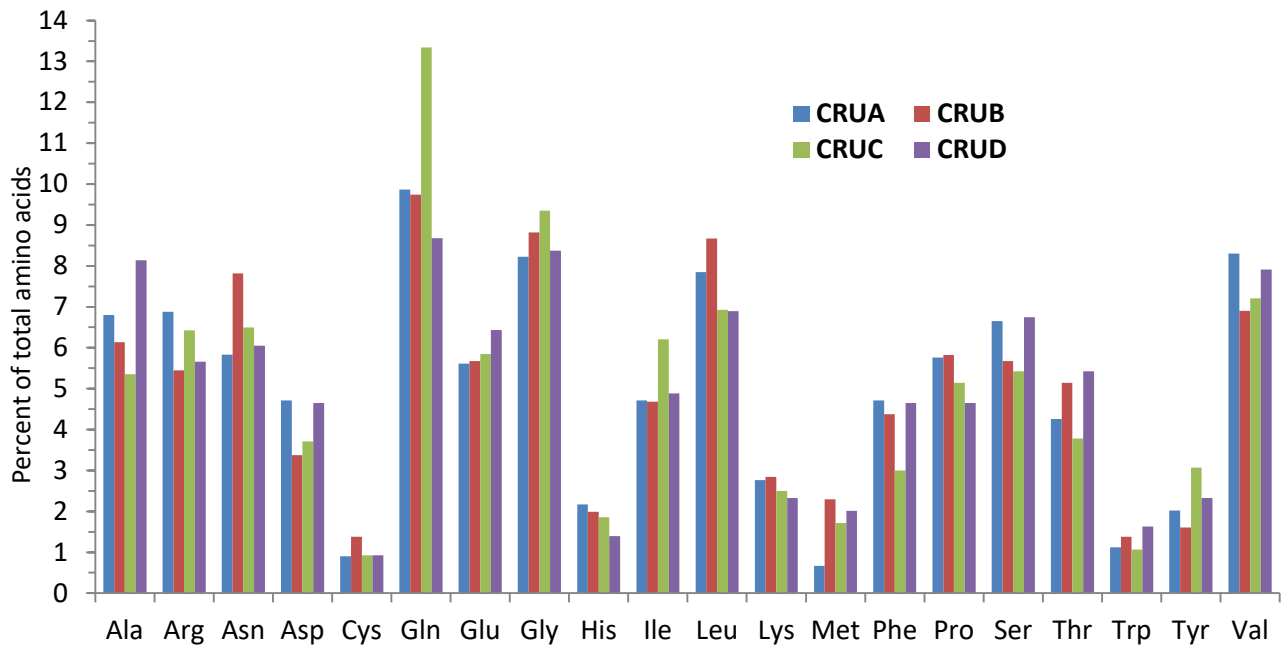

**Figure S6. Amino acid content of cruciferin A, B, C and D in *C. sativa*.** Values are based on translated nucleotide sequence of gene region not including the predicted signal peptide, and represent average of the three homoeologues for each cruciferin class.
